# Supplementary material
Source: PubMed Central journal article supplement (PMC5837114)
Supplement: 41437_2017_10_MOESM1_ESM.pdf [file 41437_2017_10_MOESM1_ESM.pdf]

# 1 MCMC sampling strategies for each parameter and hyper-parameter

2

## 3 (1) Joint posterior densities of the SSGBLUP, SS-BayesA and 4 SS-BayesB models

5 The joint posterior density for SSGBLUP was as below:

$$\begin{aligned} & p(\boldsymbol{\beta}, \alpha_1, \alpha_2, \dots, \alpha_m, \boldsymbol{\varepsilon}, \sigma_g^2, \sigma_\alpha^2, \sigma_e^2 | \mathbf{y}) \propto \left( \prod_{i=1}^n p(\mathbf{y}_i | \boldsymbol{\beta}, \alpha_1, \alpha_2, \dots, \alpha_m, \boldsymbol{\varepsilon}, \sigma_e^2) \right) \\ & \left( \prod_{j=1}^m p(\alpha_j | \sigma_\alpha^2) \right) p(\boldsymbol{\varepsilon} | \sigma_e^2) p(\sigma_\alpha^2 | \nu_\alpha, s_\alpha^2) p(\sigma_g^2 | \nu_g, s_g^2) p(\sigma_e^2 | \nu_e, s_e^2) \\ & \propto (\sigma_e^2)^{-n/2} \exp\left(-\frac{1}{2\sigma_e^2} \sum_{i=1}^n (y_i - \mathbf{x}_i' \boldsymbol{\beta} - \mathbf{w}_i' \boldsymbol{\alpha} - \mathbf{u}_i' \boldsymbol{\varepsilon})^2\right) (\sigma_g^2)^{-q_1/2} \exp\left(-\frac{1}{2\sigma_g^2} \boldsymbol{\varepsilon}' \mathbf{A}^{11} \boldsymbol{\varepsilon}\right) (\sigma_\alpha^2)^{-m/2} \exp\left(-\frac{1}{2\sigma_\alpha^2} \sum_{j=1}^m \alpha_j^2\right) \\ & \sigma_\alpha^{2-\left(\frac{\nu_\alpha+1}{2}\right)} e^{-\frac{\nu_\alpha s_\alpha^2}{2\sigma_\alpha^2}} \sigma_g^{2-\left(\frac{\nu_g+1}{2}\right)} e^{-\frac{\nu_g s_g^2}{2\sigma_g^2}} \sigma_e^{2-\left(\frac{\nu_e+1}{2}\right)} e^{-\frac{\nu_e s_e^2}{2\sigma_e^2}}. \end{aligned}$$

7

8 Here,  $\mathbf{y}$  was the vector of phenotype of all animals,  $\boldsymbol{\beta}$  was the fixed effects vector,

9  $\alpha_j$  was the marker effects of the  $j$ th marker,  $\boldsymbol{\varepsilon}$  was the imputation residuals vector

10 for the non-genotyped animals,  $\sigma_g^2$  and  $\sigma_\alpha^2$  were the polygenic variance and SNP

11 effects' variance,  $\sigma_e^2$  was the residual variance,  $\nu_\alpha$  and  $s_\alpha^2$  were degree of

12 freedom and scale of the scaled inverse chi-square prior of the SNP effects' variance,

13  $\nu_g$  and  $s_g^2$  were degree of freedom and scale of the scaled inverse chi-square prior

14 for the polygenic variance,  $\nu_e$  and  $s_e^2$  were degree of freedom and scale of the

15 scaled inverse chi-square prior for the residual variance.  $\mathbf{x}$ ,  $\mathbf{w}$  and  $\mathbf{u}$  were the

16 corresponding design matrices or vectors for fixed effects, SNP effects and imputation

17 residuals,  $n$  was the total number of genotyped and non-genotyped animals,  $m$

18 was the total number of markers,  $q_1$  was the number of non-genotyped animals, and

$$19 \mathbf{A}^{11} = \left( \mathbf{A}_{11} - \mathbf{A}_{12} \mathbf{A}_{22}^{-1} \mathbf{A}_{12}' \right)^{-1}.$$

20 The joint posterior density of SS-BayesA was

$$\begin{aligned}
& p(\boldsymbol{\beta}, \alpha_1, \alpha_2, \dots, \alpha_m, \boldsymbol{\varepsilon}, \sigma_g^2, \sigma_{\alpha_1}^2, \sigma_{\alpha_2}^2, \dots, \sigma_{\alpha_m}^2, \sigma_e^2, \nu_\alpha, s_\alpha^2 \mid \mathbf{y}) \propto \left( \prod_{i=1}^n p(\mathbf{y} \mid \boldsymbol{\beta}, \alpha_1, \alpha_2, \dots, \alpha_m, \boldsymbol{\varepsilon}, \sigma_e^2) \right) \\
& \left( \prod_{j=1}^m p(\alpha_j \mid \sigma_{\alpha_j}^2) \right) p(\boldsymbol{\varepsilon} \mid \sigma_g^2) \left( \prod_{j=1}^m p(\sigma_{\alpha_j}^2 \mid \nu_\alpha, s_\alpha^2) \right) p(\sigma_g^2 \mid \nu_g, s_g^2) p(\sigma_e^2 \mid \nu_e, s_e^2) p(\nu_\alpha) p(s_\alpha^2) \\
21 \quad & \propto (\sigma_e^2)^{-n/2} \exp\left(-\frac{1}{2\sigma_e^2} \sum_{i=1}^n (y_i - \mathbf{x}_i' \boldsymbol{\beta} - \mathbf{w}_i' \boldsymbol{\alpha} - \mathbf{u}_i' \boldsymbol{\varepsilon})^2\right) (\sigma_g^2)^{-q_1/2} \exp\left(-\frac{1}{2\sigma_g^2} \boldsymbol{\varepsilon}' \mathbf{A}^{11} \boldsymbol{\varepsilon}\right) \left( \prod_{j=1}^m \sigma_{\alpha_j}^2 \right)^{-1/2} \exp\left(-\frac{1}{2} \sum_{j=1}^m \frac{\alpha_j^2}{\sigma_{\alpha_j}^2}\right) \\
& \left( \prod_{j=1}^m \sigma_{\alpha_j}^{2-\left(\frac{\nu_\alpha+1}{2}\right)} e^{-\frac{\nu_\alpha s_\alpha^2}{2\sigma_{\alpha_j}^2}} \right) \sigma_g^{2-\left(\frac{\nu_g+1}{2}\right)} e^{-\frac{\nu_g s_g^2}{2\sigma_g^2}} \sigma_e^{2-\left(\frac{\nu_e+1}{2}\right)} e^{-\frac{\nu_e s_e^2}{2\sigma_e^2}} \frac{1}{(1+\nu_\alpha)^2} s_\alpha^{2-\left(\frac{\nu_\alpha+1}{2}\right)} e^{-\frac{\nu_\alpha s_\alpha^2}{2s_\alpha^2}}.
\end{aligned}$$

22

23 Here,  $\sigma_{\alpha_j}^2$  was the  $j$ th marker's marker-specific effect variance, the prior for the

24 degree of freedom ( $\nu_\alpha$ ) was  $p(\nu_\alpha) = \frac{1}{(1+\nu_\alpha)^2}$  [1], and the prior of scale ( $s_\alpha^2$ ) was a

25 scaled inverse chi-square distribution  $p(s_\alpha^2) = s_\alpha^{2-\left(\frac{\nu_\alpha+1}{2}\right)} e^{-\frac{\nu_\alpha s_\alpha^2}{2s_\alpha^2}}$ .

26 The joint posterior density of SS-BayesB was

$$\begin{aligned}
& p(\boldsymbol{\beta}, \alpha_1, \alpha_2, \dots, \alpha_m, \boldsymbol{\varepsilon}, \sigma_g^2, \sigma_{\alpha_1}^2, \sigma_{\alpha_2}^2, \dots, \sigma_{\alpha_m}^2, \sigma_e^2, \nu_\alpha, s_\alpha^2, \pi_m \mid \mathbf{y}) \propto \left( \prod_{i=1}^n p(\mathbf{y} \mid \boldsymbol{\beta}, \alpha_1, \alpha_2, \dots, \alpha_m, \boldsymbol{\varepsilon}, \sigma_e^2) \right) \\
& \left( \prod_{j=1}^{m_1} p(\alpha_j \mid \sigma_{\alpha_j}^2) \right) p(\boldsymbol{\varepsilon} \mid \sigma_g^2) \left( \prod_{j=1}^{m_1} p(\sigma_{\alpha_j}^2 \mid \nu_\alpha, s_\alpha^2) \right) p(\sigma_g^2 \mid \nu_g, s_g^2) p(\sigma_e^2 \mid \nu_e, s_e^2) p(\nu_\alpha) p(s_\alpha^2) p(\pi_m) \\
27 \quad & \propto (\sigma_e^2)^{-n/2} \exp\left(-\frac{1}{2\sigma_e^2} \sum_{i=1}^n (y_i - \mathbf{x}_i' \boldsymbol{\beta} - \mathbf{w}_i' \boldsymbol{\alpha} - \mathbf{u}_i' \boldsymbol{\varepsilon})^2\right) (\sigma_g^2)^{-q_1/2} \exp\left(-\frac{1}{2\sigma_g^2} \boldsymbol{\varepsilon}' \mathbf{A}^{11} \boldsymbol{\varepsilon}\right) \left( \prod_{j=1}^{m_1} \sigma_{\alpha_j}^2 \right)^{-1/2} \exp\left(-\frac{1}{2} \sum_{j=1}^{m_1} \frac{\alpha_j^2}{\sigma_{\alpha_j}^2}\right) \\
& \left( \prod_{j=1}^{m_1} \sigma_{\alpha_j}^{2-\left(\frac{\nu_\alpha+1}{2}\right)} e^{-\frac{\nu_\alpha s_\alpha^2}{2\sigma_{\alpha_j}^2}} \right) \sigma_g^{2-\left(\frac{\nu_g+1}{2}\right)} e^{-\frac{\nu_g s_g^2}{2\sigma_g^2}} \sigma_e^{2-\left(\frac{\nu_e+1}{2}\right)} e^{-\frac{\nu_e s_e^2}{2\sigma_e^2}} \frac{1}{(1+\nu_\alpha)^2} (s_\alpha^2)^{\alpha_\pi-1} e^{-\beta_\alpha s_\alpha^2} \pi_m^{m_1+\alpha_\pi-1} (1-\pi_m)^{m-m_1+\beta_\pi-1}.
\end{aligned}$$

28

29 Here,  $\pi_m$  was the proportion of markers which had non-zero effects,  $m_1$  was the

30 number of non-zero effect SNP,  $\pi_m$  had a beta distribution prior with

31  $p(\pi_m) = \pi_m^{\alpha_\pi-1} (1-\pi_m)^{\beta_\pi-1}$ , and  $s_\alpha^2$  had a gamma prior of

32 
$$p(s_\alpha^2 | \alpha_\alpha, \beta_\alpha) = \frac{\beta_\alpha^{\alpha_\alpha}}{\Gamma(\alpha_\alpha)} (s_\alpha^2)^{\alpha_\alpha - 1} e^{-\beta_\alpha s_\alpha^2}.$$

33

34 **(2) Sampling of polygenic variance for all three single-step models**

35 Fernando et al. [2] assumed that the polygenic variance was independent with marker  
 36 effects' variances. They used a scaled inverse chi-square prior on the polygenic  
 37 variance. The full conditional density (FCD) of polygenic variance then also followed  
 38 a scaled inverse chi-square distribution:

39 
$$p(\sigma_g^2 | ELSE) \propto (\sigma_g^2)^{-\left(\frac{q_1 + \nu_g}{2} + 1\right)} \exp\left(-\frac{1}{2\sigma_g^2} (\boldsymbol{\varepsilon}' \mathbf{A}^{11} \boldsymbol{\varepsilon} + \nu_g s_g^2)\right)$$

40 where  $\nu_g$  and  $s_g^2$  were the degree of freedom and scale of the prior, and  $q_1$  was the  
 41 total number of ungenotyped animals. This FCD of polygenic variance was used for  
 42 all the three models (SSGBLUP, SS-BayesA and SS-BayesB).

43

44 **(3) Sampling of imputation residuals for all three single-step models**

45 The FCD of imputation residuals are the same for SSGBLUP, SS-BayesA and  
 46 SS-BayesB models. The joint FCD of the imputation residuals can be written as  
 47 follow:

48 
$$p(\boldsymbol{\varepsilon} | E L S) \propto N(\boldsymbol{\mu}_\varepsilon, \boldsymbol{\Sigma}_\varepsilon)$$

49 where  $\boldsymbol{\mu}_\varepsilon = (\mathbf{Z}'_1 \mathbf{Z}_1 + \mathbf{A}^{11} \lambda_g)^{-1} \mathbf{Z}'_1 \mathbf{y}_1^*$ , and  $\boldsymbol{\Sigma}_\varepsilon = (\mathbf{Z}'_1 \mathbf{Z}_1 + \mathbf{A}^{11} \lambda_g)^{-1} \sigma_e^2$ .

50 where  $\mathbf{y}_1^* = (\mathbf{y}_1 - \mathbf{X}_1 \boldsymbol{\beta} - \mathbf{W}_1 \boldsymbol{\alpha})$ ,  $\lambda_g = \sigma_e^2 / \sigma_g^2$ , and  $\mathbf{y}_1$  is the vector of phenotype of  
 51 ungenotyped animals. The block-Gibbs sampler could be used to sample from this

52 multivariate normal distribution [2, 3].

53

54 **(4) Sampling of marker effects and their variance for SSGBLUP and**  
 55 **SS-BayesA**

56 With a scaled inverse chi-square prior  $\chi^{-2}(v_\alpha, s_\alpha^2)$ , the FCD of marker effects'

57 variance for the SSGBLUP model is

$$\begin{aligned}
 p(\alpha_\alpha^2 | ELSE) &\propto (\alpha_\alpha^2)^{-m/2} \exp\left(-\frac{1}{2\alpha_\alpha^2} \sum_{j=1}^m \alpha_j^2\right) \alpha_\alpha^2^{-\left(\frac{v_\alpha+1}{2}\right)} e^{-\frac{v_\alpha s_\alpha^2}{2\alpha_\alpha^2}} \\
 &\propto (\alpha_\alpha^2)^{\left(\frac{v_\alpha+m}{2}+1\right)} \exp\left(-\frac{1}{2\alpha_\alpha^2} \left(\sum_{j=1}^m \alpha_j^2 + v_\alpha s_\alpha^2\right)\right)
 \end{aligned}$$

59 which is also a scaled inverse chi-square distribution. For the SS-BayesA model, each

60 marker has its specific effect's variance. The FCD of  $\sigma_{\alpha_j}^2$  for the  $j^{\text{th}}$  marker in the

61 SS-BayesA model is

62

$$\begin{aligned}
 p(\alpha_{\alpha_j}^2 | ELSE) &\propto (2\pi\alpha_{\alpha_j}^2)^{-1/2} \exp\left(-\frac{1}{2\alpha_{\alpha_j}^2} \alpha_j^2\right) \alpha_{\alpha_j}^2^{-\left(\frac{v_{\alpha_j}+1}{2}\right)} e^{-\frac{v_{\alpha_j} s_{\alpha_j}^2}{2\alpha_{\alpha_j}^2}} \\
 &\propto (\alpha_{\alpha_j}^2)^{\left(\frac{v_{\alpha_j}+1}{2}+1\right)} \exp\left(-\frac{1}{2\alpha_{\alpha_j}^2} (\alpha_j^2 + v_{\alpha_j} s_{\alpha_j}^2)\right)
 \end{aligned} \tag{A1}$$

64 This is also a scaled inverse chi-square distribution. The FCD of markers effects for

65 both SSGBLUP and SS-BayesA follow normal distributions [2] with

$$p(\alpha_j | ELSE) \sim N(\tilde{\alpha}_j, \tilde{v}_{\alpha_j}) \tag{A2}$$

67 where  $j = 1, 2, \dots, m$ ,

$$\tilde{\alpha}_j = \frac{\sum_{i=1}^n w_{ij} e_i + \left(\sum_{i=1}^n w_{ij}^2\right) g_j}{\left(\sum_{i=1}^n w_{ij}^2 + \frac{\sigma_e^2}{\sigma_{\alpha_j}^2}\right)} \quad \text{and} \quad \tilde{v}_{\alpha_j} = \left(\frac{\sum_{i=1}^n (w_{ij})^2}{\sigma_e^2} + \sigma_{\alpha_j}^{-2}\right)^{-1}$$

68 where  $w_{ij}$  is the  $i$ th row and  $j$ th column of the incidence matrix  $\mathbf{W}$  of (3). For the  
69 SSGBLUP model, marker effects variance  $\sigma_{\alpha_j}^2$  is the same for all markers. For the  
70 SS-BayesA and model,  $\sigma_{\alpha_j}^2$  are unequal for different markers.

71

## 72 (5) Sampling of marker effects and their variance for SS-BayesB

73 The FCD of marker effects' variance for the  $j$ th marker in the SS-BayesB model is

$$74 \quad p\left(\sigma_{\alpha_j}^2 \mid \text{ELSE except } \alpha_j\right) \propto |\mathbf{V}_j|^{-1/2} \exp\left(-\frac{1}{2} \mathbf{y}^*{}' \mathbf{V}_j^{-1} \mathbf{y}^*\right) p\left(\sigma_{\alpha_j}^2 \mid \nu_{\alpha}, s_{\alpha}^2, \pi_m\right)$$

75 where  $\mathbf{y}^* = \left\{ y_i - \mathbf{X}_i \boldsymbol{\beta} - \sum_{k \neq j} w_{ik} \alpha_k \right\}_{i=1}^n$ ,  $\mathbf{V}_j = \mathbf{w}_j \mathbf{w}_j' \sigma_{\alpha_j}^2 + \mathbf{I} \sigma_e^2$  and  $p\left(\sigma_{\alpha_j}^2 \mid \nu_{\alpha}, s_{\alpha}^2, \pi_m\right)$  is

76 the prior density. This FCD is not recognizable, and we adopted the  
77 Metropolis-Hasting algorithm. We used the prior  $p\left(\sigma_{\alpha_j}^2 \mid \nu_{\alpha}, s_{\alpha}^2, \pi_m\right)$  as the proposal  
78 (driver) density [4], where the prior is a scaled inverse chi-square distribution. Then,  
79 the Metropolis-Hastings acceptance ratio (for  $j$ th marker) of the new proposal  $\sigma_{\alpha_j}^{2*}$  is:

$$80 \quad \alpha\left(\sigma_{\alpha_{j[t-1]}}^2, \sigma_{\alpha_j}^{2*}\right) = \min\left(\frac{p\left(\sigma_{\alpha_j}^{2*} \mid \text{ELSE except } \alpha_j\right) p\left(\sigma_{\alpha_{j[t-1]}}^2 \mid \nu_{\alpha}, s_{\alpha}^2, \pi_m\right)}{p\left(\sigma_{\alpha_{j[t-1]}}^2 \mid \text{ELSE except } \alpha_j\right) p\left(\sigma_{\alpha_j}^{2*} \mid \nu_{\alpha}, s_{\alpha}^2, \pi_m\right)}, 1\right)$$

81 This ratio is further equal to:

$$82 \quad \alpha\left(\sigma_{\alpha_{j[t-1]}}^2, \sigma_{\alpha_j}^{2*}\right) = \min\left(\frac{|\mathbf{V}_j^*|^{-1/2} \exp\left(-\frac{1}{2} \mathbf{y}^*{}' \mathbf{V}_j^{*-1} \mathbf{y}^*\right)}{|\mathbf{V}_j^{[t-1]}|^{-1/2} \exp\left(-\frac{1}{2} \mathbf{y}^*{}' \left(\mathbf{V}_j^{[t-1]}\right)^{-1} \mathbf{y}^*\right)}, 1\right)$$

$$= \min\left(\frac{\nu_j^{*-1/2} \exp\left(-\frac{r_j^2}{2\nu_j^*}\right)}{\nu_j^{[t-1]-1/2} \exp\left(-\frac{r_j^2}{2\nu_j^{[t-1]}}\right)}, 1\right)$$

83 where  $r_j = \mathbf{w}_j' \mathbf{y}^*$ ,  $\nu_j = \left(\mathbf{w}_j' \mathbf{w}_j\right)^2 \sigma_{\alpha_j}^2 + \mathbf{w}_j' \mathbf{w}_j \sigma_e^2$ , and the proposal density is

84 
$$p(\sigma_{\alpha_j}^2 | v_\alpha, s_\alpha^2, \pi_m) \propto \begin{cases} 0 & \text{with probability of } (1 - \pi_m) \\ \chi^{-2}(v_\alpha, s_\alpha^2) & \text{with probability of } \pi_m \end{cases}.$$

85 Then, we can accept  $\sigma_{\alpha_j}^{2*}$  with the probability of  $\alpha(\sigma_{\alpha_{j[l-1]}}^2, \sigma_{\alpha_j}^{2*})$ . If the accepted  $\sigma_{\alpha_j}^{2*}$   
 86 is not zero, then SNP effect of marker  $j$  is sampled from its FCD, which is the same as  
 87 in the SS-BayesA model; if the new accepted  $\sigma_{\alpha_j}^{2*}$  is zero, then SNP effect of marker  
 88  $j$  is also zero. During the MCMC sampling procedure, the latest estimates of  
 89  $v_\alpha, s_\alpha^2, \pi_m$  were used in the proposal density.

90

91 **(6) Sampling of scale ( $s_\alpha^2$ ) and degree of freedom ( $v_\alpha$ ) in SS-BayesA**

92 **Sampling of scale ( $s_\alpha^2$ )**

93 For  $s_\alpha^2$ , we used a scaled inverse chi-square prior  $\chi^{-2}(v_s = -1, s_s^2 = 0)$ . Then, the FCD  
 94 of  $s_\alpha^2$  is:

95 
$$p(s_\alpha^2 | ELSE) \propto \left( \prod_{j=1}^m p(\sigma_{\alpha_j}^2 | v_\alpha, s_\alpha^2) \right) p(s_\alpha^2) \\ \propto \left( \prod_{j=1}^m \frac{(v_\alpha s_\alpha^2)^{\frac{v_\alpha}{2}}}{\Gamma\left(\frac{v_\alpha}{2}\right)} \sigma_{\alpha_j}^2^{-\left(\frac{v_\alpha}{2}+1\right)} e^{-\frac{v_\alpha s_\alpha^2}{2\sigma_{\alpha_j}^2}} \right) s_\alpha^2^{-\left(\frac{v_s}{2}+1\right)} e^{-\frac{v_s s_s^2}{2s_\alpha^2}}$$

96 It can be further simplified by integrating out marker effects' variances [5], then

97 
$$p(s_\alpha^2 | ELSE) \propto \left( \prod_{j=1}^m \frac{\Gamma\left(\frac{v_\alpha+1}{2}\right)}{\Gamma\left(\frac{v_\alpha}{2}\right)} \left(\frac{1}{\pi v_\alpha s_\alpha^2}\right)^{1/2} \left(1 + \frac{\alpha_j^2}{v_\alpha s_\alpha^2}\right)^{-\frac{v_\alpha+1}{2}} \right) s_\alpha^2^{-\left(\frac{v_s}{2}+1\right)} e^{-\frac{v_s s_s^2}{2s_\alpha^2}}.$$

98 This FCD is not recognizable. Therefore, we used the Metropolis-Hasting sampling  
 99 strategy with a truncated normal distribution as the proposal density to draw samples  
 100 on  $s_\alpha^2$  [6].

101 **Sampling of degree of freedom ( $v_\alpha$ )**

102 The FCD of  $v_\alpha$  with a vaguely informative prior of  $p(v_\alpha) = \frac{1}{(1+v_\alpha)^2}$  [1] is as follow:

$$\begin{aligned}
 p(v_\alpha | ELSE) &\propto \left( \prod_{j=1}^m p(\sigma_{\alpha_j}^2 | v_\alpha, s_\alpha^2) \right) p(v_\alpha) \\
 &\propto \left( \prod_{j=1}^m \frac{\Gamma\left(\frac{v_\alpha + 1}{2}\right)}{\Gamma\left(\frac{v_\alpha}{2}\right)} \left(\frac{1}{\pi v_\alpha s_\alpha^2}\right)^{1/2} \left(1 + \frac{\alpha_j^2}{v_\alpha s_\alpha^2}\right)^{-\frac{v_\alpha + 1}{2}} \right) \frac{1}{(1+v_\alpha)^2},
 \end{aligned}$$

104 where  $m$  is the total number of markers. As this FCD is not recognizable, we also used  
 105 Metropolis-Hasting sampling strategy with a truncated normal distribution as the  
 106 proposal density to sample  $v_\alpha$ .

107 **(7) Sampling of hyper-parameters ( $s_\alpha^2$ ,  $v_\alpha$  and  $\pi_m$ ) in SS-BayesB**

108 **Sampling of sacle ( $s_\alpha^2$ )**

109 We used a conjugate gamma prior  $p(s_\alpha^2 | \alpha_\alpha = 0.1, \beta_\alpha = 0.1) = \frac{(\beta_\alpha)^{\alpha_\alpha}}{\Gamma(\alpha_\alpha)} (s_\alpha^2)^{\alpha_\alpha - 1} e^{-\beta_\alpha s_\alpha^2}$  on  $s_\alpha^2$  of

110 SS-BayesB, then the FCD was

$$\begin{aligned}
 p(s_\alpha^2 | ELSE) &\propto \left( \prod_{j=1}^{m_1} p(\sigma_{\alpha_j}^2 | v_\alpha, s_\alpha^2) \right) p(s_\alpha^2) \\
 &\propto \left( \prod_{j=1}^m I(\sigma_{\alpha_j}^2 \neq 0) \frac{\left(\frac{v_\alpha s_\alpha^2}{2}\right)^{\frac{v_\alpha}{2}}}{\Gamma\left(\frac{v_\alpha}{2}\right)} \sigma_{\alpha_j}^2^{-\left(\frac{v_\alpha}{2} + 1\right)} e^{-\frac{v_\alpha s_\alpha^2}{2\sigma_{\alpha_j}^2}} \right) (s_\alpha^2)^{\alpha_\alpha - 1} e^{-\beta_\alpha s_\alpha^2} \propto (s_\alpha^2)^{\frac{m_1 v_\alpha}{2} + \alpha_\alpha - 1} e^{-\left(\frac{v_\alpha}{2 \sum_{j=1}^m \sigma_{\alpha_j}^2 I(\sigma_{\alpha_j}^2 \neq 0)} + \beta_\alpha\right) s_\alpha^2}
 \end{aligned}$$

112

113 where  $m_1$  is the number of markers with non-zero effects. It is again a gamma

114 distribution. A Gibbs sampler was applied here to draw MCMC samples.

115 **Sampling of degree of freedom ( $\nu_\alpha$ )**

116 For  $\nu_\alpha$  of SS-BayesB, its FCD was

$$\begin{aligned}
 p(\nu_\alpha | ELSE) &\propto \left( \prod_{j=1}^m I(\alpha_j \neq 0) p(\sigma_{\alpha_j}^2 | \nu_\alpha, s_\alpha^2) \right) p(\nu_\alpha) \\
 &\propto \left( \prod_{j=1}^m I(\alpha_j \neq 0) \frac{\Gamma\left(\frac{\nu_\alpha + 1}{2}\right)}{\Gamma\left(\frac{\nu_\alpha}{2}\right)} \left(\frac{1}{\pi \nu_\alpha s_\alpha^2}\right)^{1/2} \left(1 + \frac{\alpha_j^2}{\nu_\alpha s_\alpha^2}\right)^{-\frac{\nu_\alpha + 1}{2}} \right) \frac{1}{(1 + \nu_\alpha)^2} .
 \end{aligned}$$

118

119 Similar to SS-BayesA, Metropolis-Hasting sampling strategy with a normal

120 distribution proposal density was used to sample  $\nu_\alpha$ .

121 **Sampling of  $\pi_m$**

122 A beta prior  $beta(\alpha_\pi = 1, \beta_\pi = 10)$  was used for  $\pi_m$ , and its FCD was

$$p(\pi_m) \propto \pi_m^{m_1 + \alpha_\pi - 1} (1 - \pi_m)^{m - m_1 + \beta_\pi - 1} .$$

124 It was still a beta distribution, and Gibbs sampling was used here to sample from this

125 beta distribution.

126 We used  $(s_\alpha^2)^{\frac{m_1 \nu_\alpha + \alpha_\alpha - 1}{2}} e^{-\left(\sum_{j=1}^m I(\sigma_{\alpha_j}^2 \neq 0) \frac{\nu_\alpha}{2 \sigma_{\alpha_j}^2} + \beta_\alpha\right) s_\alpha^2}$  (a gamma density distribution) as the

127 proposal density in the Metropolis-Hasting sampling strategy for  $s_\alpha^2$  here.

128

129 **References:**

130

131 1. Kizilkaya K and Tempelman RJ. 2005. A general approach to mixed effects modeling of 24  
 132 residual variances in generalized linear mixed models. Genetics Selection Evolution 37:  
 133 31-56.

134 2. Fernando RL, Dekkers JCM and Garrick DJ. 2014. A class of Bayesian methods to combine  
 135 large numbers of genotyped and non-genotyped animals for whole-genome analyses. Genetics  
 136 Selection Evolution. 46:50.

137 3. Sorensen D and Gianola D. 2002. Likelihood, Bayesian, and MCMC methods in quantitative



- 138 genetics. Springer Science & Business Media.
- 139 4. Meuwissen TH, Hayes BJ, Goddard ME. Prediction of total genetic value using genome-wide  
140 dense marker maps. *Genetics*, 2001, 157(4):1819-1829.
- 141 5. Gianola D, Campos GDL, Hill WG, et al. Additive genetic variability and the Bayesian  
142 alphabet. *Genetics*, 2009, 183(1):347-63.
- 143 6. Yang W and Tempelman RJ 2011. A Bayesian antedependence model for whole genome  
144 prediction. *Genetics*. 2012 Apr; 190(4):1491-501.
