# Supplementary material
Source: PubMed Central journal article supplement (PMC5837114)
Supplement: 41437_2017_10_MOESM3_ESM.pdf [file 41437_2017_10_MOESM3_ESM.pdf]

**Table A1** The means and standard errors of GEBV accuracy for ungenotyped individuals comparing different validation generations at different QTL scenarios and different single-step models (supplemental table for Figure 2).

| Models    | QTL scenarios | Validation generations |            |            |
|-----------|---------------|------------------------|------------|------------|
|           |               | 5003                   | 5004       | 5005       |
| SSGBLUP   | 5 QTL         | 0.43±0.020             | 0.31±0.027 | 0.27±0.017 |
|           | 50 QTL        | 0.41±0.018             | 0.34±0.015 | 0.27±0.029 |
|           | 500 QTL       | 0.44±0.020             | 0.34±0.018 | 0.23±0.008 |
| SS-BayesA | 5 QTL         | 0.61±0.012             | 0.53±0.014 | 0.48±0.019 |
|           | 50 QTL        | 0.45±0.020             | 0.40±0.018 | 0.35±0.028 |
|           | 500 QTL       | 0.44±0.020             | 0.34±0.018 | 0.24±0.008 |
| SS-BayesB | 5 QTL         | 0.63±0.012             | 0.55±0.013 | 0.47±0.039 |
|           | 50 QTL        | 0.51±0.018             | 0.48±0.014 | 0.40±0.031 |
|           | 500 QTL       | 0.40±0.033             | 0.31±0.027 | 0.22±0.018 |

**Table A2** The means and standard errors of GEBV accuracy for genotyped individuals comparing different validation generations at different QTL scenarios and different single-step models (supplemental table for Figure 2).

| Models    | QTL scenarios | Validation generations |            |            |
|-----------|---------------|------------------------|------------|------------|
|           |               | 5003                   | 5004       | 5005       |
| SSGBLUP   | 5 QTL         | 0.48±0.015             | 0.41±0.020 | 0.34±0.021 |
|           | 50 QTL        | 0.45±0.019             | 0.39±0.008 | 0.34±0.016 |
|           | 500 QTL       | 0.46±0.020             | 0.36±0.017 | 0.32±0.021 |
| SS-BayesA | 5 QTL         | 0.95±0.006             | 0.95±0.006 | 0.95±0.008 |
|           | 50 QTL        | 0.58±0.029             | 0.58±0.027 | 0.55±0.028 |
|           | 500 QTL       | 0.46±0.019             | 0.37±0.016 | 0.32±0.021 |
| SS-BayesB | 5 QTL         | 0.98±0.002             | 0.98±0.003 | 0.93±0.050 |
|           | 50 QTL        | 0.74±0.019             | 0.75±0.017 | 0.66±0.065 |
|           | 500 QTL       | 0.40±0.025             | 0.33±0.023 | 0.28±0.016 |

**Table A3** The means and standard errors of GEBV accuracy for ungenotyped individuals comparing different single-step models at different QTL scenarios and different validation generations (supplemental table for Figure 3).

| Validation generations | QTL scenarios | Models      |             |             |
|------------------------|---------------|-------------|-------------|-------------|
|                        |               | SSGBLUP     | SS-BayesA   | SS-BayesB   |
| 5003                   | 5 QTL         | 0.43 ±0.020 | 0.61 ±0.012 | 0.63 ±0.012 |
|                        | 50 QTL        | 0.41 ±0.018 | 0.45 ±0.020 | 0.51 ±0.018 |
|                        | 500 QTL       | 0.44 ±0.020 | 0.44 ±0.020 | 0.40 ±0.033 |
| 5004                   | 5 QTL         | 0.31 ±0.027 | 0.53 ±0.014 | 0.55 ±0.013 |
|                        | 50 QTL        | 0.34 ±0.015 | 0.40 ±0.018 | 0.48 ±0.014 |
|                        | 500 QTL       | 0.34 ±0.018 | 0.34 ±0.018 | 0.31 ±0.027 |
| 5005                   | 5 QTL         | 0.27 ±0.017 | 0.48 ±0.019 | 0.47 ±0.039 |
|                        | 50 QTL        | 0.27 ±0.029 | 0.35 ±0.028 | 0.40 ±0.031 |
|                        | 500 QTL       | 0.23 ±0.008 | 0.24 ±0.008 | 0.22 ±0.018 |

**Table A4** The means and standard errors of GEBV accuracy for genotyped individuals comparing different single-step models at different QTL scenarios and different validation generations (supplemental table for Figure 3).

| Validation generations | QTL scenarios | Models      |             |             |
|------------------------|---------------|-------------|-------------|-------------|
|                        |               | SSGBLUP     | SS-BayesA   | SS-BayesB   |
| 5003                   | 5 QTL         | 0.48 ±0.015 | 0.95 ±0.006 | 0.98 ±0.002 |
|                        | 50 QTL        | 0.45 ±0.019 | 0.58 ±0.027 | 0.74 ±0.019 |
|                        | 500 QTL       | 0.46 ±0.020 | 0.46 ±0.016 | 0.40 ±0.025 |
| 5004                   | 5 QTL         | 0.41 ±0.020 | 0.95 ±0.006 | 0.98 ±0.003 |
|                        | 50 QTL        | 0.39 ±0.008 | 0.58 ±0.027 | 0.75 ±0.017 |
|                        | 500 QTL       | 0.36 ±0.017 | 0.37 ±0.016 | 0.33 ±0.023 |
| 5005                   | 5 QTL         | 0.34 ±0.021 | 0.95 ±0.008 | 0.93 ±0.050 |
|                        | 50 QTL        | 0.34 ±0.016 | 0.55 ±0.028 | 0.66 ±0.065 |
|                        | 500 QTL       | 0.32 ±0.021 | 0.32 ±0.021 | 0.28 ±0.016 |

**Table A5** The means and standard errors of GEBV accuracy for ungenotyped individuals comparing different QTL numbers at different validation generations with different single-step models (supplemental table for Figure 4).

| Models    | Validation generations | QTL scenarios |            |            |
|-----------|------------------------|---------------|------------|------------|
|           |                        | 5             | 50         | 500        |
| SSGBLUP   | 5003                   | 0.43±0.020    | 0.31±0.027 | 0.27±0.017 |
|           | 5004                   | 0.41±0.018    | 0.34±0.015 | 0.27±0.029 |
|           | 5005                   | 0.44±0.020    | 0.34±0.018 | 0.23±0.008 |
| SS-BayesA | 5003                   | 0.61±0.012    | 0.53±0.014 | 0.48±0.019 |
|           | 5004                   | 0.45±0.020    | 0.40±0.018 | 0.35±0.028 |
|           | 5005                   | 0.44±0.020    | 0.34±0.018 | 0.24±0.008 |
| SS-BayesB | 5003                   | 0.63±0.006    | 0.55±0.006 | 0.47±0.008 |
|           | 5004                   | 0.51±0.029    | 0.48±0.027 | 0.40±0.028 |
|           | 5005                   | 0.40±0.019    | 0.31±0.016 | 0.22±0.021 |

**Table A6** The means and standard errors of GEBV accuracy for genotyped individuals comparing different QTL numbers at different validation generations with different single-step models (supplemental table for Figure 4).

| Models    | Validation generations | QTL scenarios |            |            |
|-----------|------------------------|---------------|------------|------------|
|           |                        | 5             | 50         | 500        |
| SSGBLUP   | 5003                   | 0.48±0.015    | 0.41±0.020 | 0.34±0.021 |
|           | 5004                   | 0.45±0.019    | 0.39±0.008 | 0.34±0.016 |
|           | 5005                   | 0.46±0.020    | 0.36±0.017 | 0.32±0.021 |
| SS-BayesA | 5003                   | 0.95±0.006    | 0.95±0.006 | 0.95±0.008 |
|           | 5004                   | 0.58±0.029    | 0.58±0.027 | 0.55±0.028 |
|           | 5005                   | 0.46±0.019    | 0.37±0.016 | 0.32±0.021 |
| SS-BayesB | 5003                   | 0.98±0.002    | 0.98±0.003 | 0.93±0.050 |
|           | 5004                   | 0.74±0.019    | 0.75±0.017 | 0.66±0.065 |
|           | 5005                   | 0.40±0.025    | 0.33±0.023 | 0.28±0.016 |
